# Supplementary material
Source: MDPI journal article supplement (https://www.mdpi.com/1424-2818/14/1/3)
Supplement: s1 [file s1]

# An Improved Method for Assessing Simple Sequence Repeat (SSR) Variation in *Echinochloa crus-galli* (L.) P. Beauv (Barnyardgrass)

Carlo Maria Cusaro, Carolina Grazioli, Francesco Zambuto, Enrica Capelli, Maura Brusoni\*

Department of Earth and Environmental Sciences, University of Pavia, via S. Epifanio 14, 27100 Pavia (Italy)

\* Correspondence: maura.brusoni@unipv.it

## Supplementary Material

**Table S1.** Summary of population ID and agronomic managements.

| Plot | N | Agronomic management      | Population ID |
|------|---|---------------------------|---------------|
| 1    | 4 | Conventional weed control | EcgP01        |
| 2    | 4 | Conventional weed control | EcgP02        |
| 3    | 4 | Conventional weed control | EcgP03        |
| 4    | 4 | Conventional weed control | EcgP04        |
| 5    | 4 | Conventional weed control | EcgP05        |
| 6    | 4 | Conventional weed control | EcgP06        |
| 7    | 4 | Conventional weed control | EcgP07        |
| 8    | 4 | Conventional weed control | EcgP08        |
| 9    | 4 | Conventional weed control | EcgP09        |
| 10   | 4 | Conventional weed control | EcgP10        |
| 11   | 4 | Conventional weed control | EcgP11        |
| 12   | 4 | Conventional weed control | EcgP12        |
| 13   | 4 | Conventional weed control | EcgP13        |
| 14   | 4 | Conventional weed control | EcgP14        |
| 15   | 4 | Conventional weed control | EcgP15        |
| 16   | 4 | Conventional weed control | EcgP16        |
| 17   | 4 | Conventional weed control | EcgP17        |
| 18   | 4 | Conventional weed control | EcgP18        |
| 19   | 4 | Conventional weed control | EcgP19        |
| 20   | 4 | Pre-emergent weed control | EcgP20        |
| 21   | 4 | Pre-emergent weed control | EcgP21        |
| 22   | 5 | Pre-emergent weed control | EcgP22        |
| 23   | 4 | Pre-emergent weed control | EcgP23        |
| 24   | 4 | Pre-emergent weed control | EcgP24        |
| 25   | 5 | Pre-emergent weed control | EcgP25        |
| 26   | 4 | Pre-emergent weed control | EcgP26        |
| 27   | 4 | Pre-emergent weed control | EcgP27        |
| 28   | 4 | Pre-emergent weed control | EcgP28        |
| 29   | 4 | Pre-emergent weed control | EcgP29        |
| 30   | 4 | Pre-emergent weed control | EcgP30        |
| 31   | 4 | Pre-emergent weed control | EcgP31        |
| 32   | 4 | Conventional weed control | EcgP32        |
| 33   | 4 | Conventional weed control | EcgP33        |
| 34   | 4 | Conventional weed control | EcgP34        |
| 35   | 4 | Conventional weed control | EcgP35        |
| 36   | 4 | Conventional weed control | EcgP36        |

*Plot* = experimental parcel in rice fields where *Echinochloa* samples have been collected, *N* = number of individuals collected per plot, *Agronomic management* = chemical control applied in plots, *Population ID* = Population identification code.

**Table S2.** Sequences of the primers for amplification of two noncoding regions of chloroplast DNA (cpDNA).

| Primer | Sequence 5' --- 3'      |
|--------|-------------------------|
| Trn-a  | F: CATTACAAATGCGATGCTCT |
| Trn-b1 | R: AACGATCGAATGAAAATGCC |
| Trn-c  | F: CGAAATCGGTAGACGCTACG |
| Trn-d  | R: GGGGATAGAGGGACTTGAAC |

Table S3. Pairwise Fst values between populations.

| Populations | P1    | P2    | P3    | P4    | P5    | P6    | P7    | P8    | P9    | P10   | P11   | P12   | P13   | P14   | P15   | P16   | P17   | P18   | P19   | P20   | P21   | P22   | P23   | P24   | P25   | P26   | P27   | P28   | P29   | P30   | P31   | P32   | P33   | P34   | P35   | P36 |
|-------------|-------|-------|-------|-------|-------|-------|-------|-------|-------|-------|-------|-------|-------|-------|-------|-------|-------|-------|-------|-------|-------|-------|-------|-------|-------|-------|-------|-------|-------|-------|-------|-------|-------|-------|-------|-----|
| P1          | --    | --    |       |       |       |       |       |       |       |       |       |       |       |       |       |       |       |       |       |       |       |       |       |       |       |       |       |       |       |       |       |       |       |       |       |     |
| P2          | 0.087 | --    |       |       |       |       |       |       |       |       |       |       |       |       |       |       |       |       |       |       |       |       |       |       |       |       |       |       |       |       |       |       |       |       |       |     |
| P3          | 0.055 | 0.050 | --    |       |       |       |       |       |       |       |       |       |       |       |       |       |       |       |       |       |       |       |       |       |       |       |       |       |       |       |       |       |       |       |       |     |
| P4          | 0.055 | 0.063 | 0.029 | --    |       |       |       |       |       |       |       |       |       |       |       |       |       |       |       |       |       |       |       |       |       |       |       |       |       |       |       |       |       |       |       |     |
| P5          | 0.087 | 0.003 | 0.052 | 0.062 | --    |       |       |       |       |       |       |       |       |       |       |       |       |       |       |       |       |       |       |       |       |       |       |       |       |       |       |       |       |       |       |     |
| P6          | 0.094 | 0.045 | 0.090 | 0.104 | 0.043 | --    |       |       |       |       |       |       |       |       |       |       |       |       |       |       |       |       |       |       |       |       |       |       |       |       |       |       |       |       |       |     |
| P7          | 0.065 | 0.046 | 0.085 | 0.090 | 0.053 | 0.112 | --    |       |       |       |       |       |       |       |       |       |       |       |       |       |       |       |       |       |       |       |       |       |       |       |       |       |       |       |       |     |
| P8          | 0.059 | 0.051 | 0.087 | 0.080 | 0.058 | 0.101 | 0.006 | --    |       |       |       |       |       |       |       |       |       |       |       |       |       |       |       |       |       |       |       |       |       |       |       |       |       |       |       |     |
| P9          | 0.087 | 0.010 | 0.054 | 0.060 | 0.017 | 0.063 | 0.037 | 0.039 | --    |       |       |       |       |       |       |       |       |       |       |       |       |       |       |       |       |       |       |       |       |       |       |       |       |       |       |     |
| P10         | 0.096 | 0.039 | 0.063 | 0.056 | 0.043 | 0.089 | 0.059 | 0.051 | 0.025 | --    |       |       |       |       |       |       |       |       |       |       |       |       |       |       |       |       |       |       |       |       |       |       |       |       |       |     |
| P11         | 0.057 | 0.099 | 0.071 | 0.048 | 0.099 | 0.137 | 0.091 | 0.082 | 0.098 | 0.093 | --    |       |       |       |       |       |       |       |       |       |       |       |       |       |       |       |       |       |       |       |       |       |       |       |       |     |
| P12         | 0.110 | 0.106 | 0.113 | 0.103 | 0.111 | 0.177 | 0.100 | 0.099 | 0.109 | 0.114 | 0.076 | --    |       |       |       |       |       |       |       |       |       |       |       |       |       |       |       |       |       |       |       |       |       |       |       |     |
| P13         | 0.051 | 0.104 | 0.087 | 0.064 | 0.101 | 0.137 | 0.074 | 0.065 | 0.101 | 0.095 | 0.027 | 0.128 | --    |       |       |       |       |       |       |       |       |       |       |       |       |       |       |       |       |       |       |       |       |       |       |     |
| P14         | 0.060 | 0.100 | 0.090 | 0.078 | 0.097 | 0.146 | 0.074 | 0.073 | 0.105 | 0.094 | 0.052 | 0.112 | 0.029 | --    |       |       |       |       |       |       |       |       |       |       |       |       |       |       |       |       |       |       |       |       |       |     |
| P15         | 0.093 | 0.133 | 0.112 | 0.109 | 0.138 | 0.150 | 0.150 | 0.141 | 0.151 | 0.156 | 0.081 | 0.128 | 0.119 | 0.123 | --    |       |       |       |       |       |       |       |       |       |       |       |       |       |       |       |       |       |       |       |       |     |
| P16         | 0.084 | 0.093 | 0.076 | 0.062 | 0.098 | 0.138 | 0.100 | 0.092 | 0.090 | 0.084 | 0.082 | 0.133 | 0.094 | 0.102 | 0.081 | --    |       |       |       |       |       |       |       |       |       |       |       |       |       |       |       |       |       |       |       |     |
| P17         | 0.043 | 0.099 | 0.076 | 0.061 | 0.104 | 0.146 | 0.063 | 0.054 | 0.097 | 0.090 | 0.058 | 0.113 | 0.059 | 0.068 | 0.117 | 0.052 | --    |       |       |       |       |       |       |       |       |       |       |       |       |       |       |       |       |       |       |     |
| P18         | 0.051 | 0.108 | 0.084 | 0.059 | 0.113 | 0.126 | 0.089 | 0.067 | 0.101 | 0.089 | 0.066 | 0.133 | 0.072 | 0.092 | 0.115 | 0.054 | 0.014 | --    |       |       |       |       |       |       |       |       |       |       |       |       |       |       |       |       |       |     |
| P19         | 0.060 | 0.127 | 0.103 | 0.083 | 0.133 | 0.155 | 0.094 | 0.076 | 0.124 | 0.107 | 0.080 | 0.145 | 0.080 | 0.098 | 0.113 | 0.075 | 0.025 | 0.022 | --    |       |       |       |       |       |       |       |       |       |       |       |       |       |       |       |       |     |
| P20         | 0.216 | 0.234 | 0.241 | 0.242 | 0.238 | 0.281 | 0.202 | 0.197 | 0.236 | 0.249 | 0.216 | 0.223 | 0.218 | 0.216 | 0.260 | 0.235 | 0.203 | 0.218 | 0.225 | --    |       |       |       |       |       |       |       |       |       |       |       |       |       |       |       |     |
| P21         | 0.216 | 0.234 | 0.241 | 0.242 | 0.238 | 0.281 | 0.202 | 0.197 | 0.236 | 0.249 | 0.216 | 0.223 | 0.218 | 0.216 | 0.260 | 0.235 | 0.203 | 0.218 | 0.225 | 0.000 | --    |       |       |       |       |       |       |       |       |       |       |       |       |       |       |     |
| P22         | 0.223 | 0.236 | 0.243 | 0.248 | 0.240 | 0.296 | 0.203 | 0.203 | 0.241 | 0.256 | 0.222 | 0.224 | 0.224 | 0.217 | 0.270 | 0.241 | 0.209 | 0.233 | 0.237 | 0.007 | 0.007 | --    |       |       |       |       |       |       |       |       |       |       |       |       |       |     |
| P23         | 0.230 | 0.238 | 0.245 | 0.254 | 0.242 | 0.310 | 0.204 | 0.209 | 0.245 | 0.262 | 0.226 | 0.223 | 0.230 | 0.217 | 0.277 | 0.246 | 0.216 | 0.247 | 0.249 | 0.018 | 0.018 | 0.009 | --    |       |       |       |       |       |       |       |       |       |       |       |       |     |
| P24         | 0.168 | 0.160 | 0.168 | 0.179 | 0.159 | 0.239 | 0.125 | 0.140 | 0.163 | 0.180 | 0.152 | 0.150 | 0.152 | 0.128 | 0.188 | 0.150 | 0.142 | 0.183 | 0.182 | 0.123 | 0.123 | 0.103 | 0.091 | --    |       |       |       |       |       |       |       |       |       |       |       |     |
| P25         | 0.193 | 0.223 | 0.227 | 0.228 | 0.232 | 0.261 | 0.200 | 0.187 | 0.235 | 0.238 | 0.209 | 0.230 | 0.208 | 0.219 | 0.250 | 0.239 | 0.206 | 0.208 | 0.191 | 0.172 | 0.172 | 0.171 | 0.205 | 0.173 | --    |       |       |       |       |       |       |       |       |       |       |     |
| P26         | 0.131 | 0.147 | 0.138 | 0.153 | 0.152 | 0.236 | 0.120 | 0.131 | 0.164 | 0.182 | 0.142 | 0.162 | 0.141 | 0.120 | 0.195 | 0.165 | 0.128 | 0.169 | 0.159 | 0.163 | 0.163 | 0.150 | 0.147 | 0.075 | 0.129 | --    |       |       |       |       |       |       |       |       |       |     |
| P27         | 0.114 | 0.142 | 0.126 | 0.137 | 0.148 | 0.219 | 0.117 | 0.124 | 0.157 | 0.177 | 0.128 | 0.166 | 0.127 | 0.105 | 0.176 | 0.149 | 0.111 | 0.145 | 0.148 | 0.165 | 0.165 | 0.162 | 0.158 | 0.092 | 0.169 | 0.016 | --    |       |       |       |       |       |       |       |       |     |
| P28         | 0.150 | 0.169 | 0.151 | 0.173 | 0.177 | 0.279 | 0.139 | 0.157 | 0.189 | 0.214 | 0.158 | 0.195 | 0.156 | 0.129 | 0.222 | 0.182 | 0.147 | 0.201 | 0.199 | 0.208 | 0.208 | 0.195 | 0.182 | 0.089 | 0.232 | 0.024 | 0.017 | --    |       |       |       |       |       |       |       |     |
| P29         | 0.108 | 0.141 | 0.126 | 0.131 | 0.146 | 0.204 | 0.117 | 0.118 | 0.154 | 0.164 | 0.122 | 0.165 | 0.121 | 0.100 | 0.167 | 0.143 | 0.105 | 0.129 | 0.130 | 0.158 | 0.158 | 0.160 | 0.162 | 0.105 | 0.146 | 0.024 | 0.006 | 0.037 | --    |       |       |       |       |       |       |     |
| P30         | 0.140 | 0.158 | 0.141 | 0.165 | 0.170 | 0.272 | 0.136 | 0.155 | 0.189 | 0.208 | 0.158 | 0.189 | 0.154 | 0.117 | 0.218 | 0.183 | 0.149 | 0.202 | 0.196 | 0.199 | 0.199 | 0.187 | 0.174 | 0.084 | 0.221 | 0.020 | 0.016 | 0.005 | 0.030 | --    |       |       |       |       |       |     |
| P31         | 0.159 | 0.180 | 0.161 | 0.185 | 0.192 | 0.295 | 0.147 | 0.165 | 0.198 | 0.220 | 0.161 | 0.211 | 0.156 | 0.139 | 0.238 | 0.190 | 0.156 | 0.210 | 0.207 | 0.223 | 0.223 | 0.212 | 0.199 | 0.103 | 0.249 | 0.043 | 0.037 | 0.012 | 0.054 | 0.026 | --    |       |       |       |       |     |
| P32         | 0.104 | 0.127 | 0.109 | 0.122 | 0.129 | 0.188 | 0.095 | 0.095 | 0.128 | 0.123 | 0.103 | 0.113 | 0.102 | 0.091 | 0.145 | 0.124 | 0.086 | 0.113 | 0.114 | 0.176 | 0.176 | 0.175 | 0.175 | 0.114 | 0.181 | 0.086 | 0.080 | 0.098 | 0.080 | 0.100 | 0.104 | --    |       |       |       |     |
| P33         | 0.181 | 0.214 | 0.190 | 0.208 | 0.220 | 0.262 | 0.186 | 0.178 | 0.219 | 0.209 | 0.194 | 0.192 | 0.194 | 0.186 | 0.215 | 0.205 | 0.173 | 0.188 | 0.198 | 0.276 | 0.276 | 0.282 | 0.288 | 0.223 | 0.291 | 0.238 | 0.227 | 0.266 | 0.223 | 0.260 | 0.282 | 0.068 | --    |       |       |     |
| P34         | 0.212 | 0.244 | 0.223 | 0.235 | 0.246 | 0.284 | 0.211 | 0.202 | 0.240 | 0.231 | 0.218 | 0.217 | 0.221 | 0.214 | 0.233 | 0.224 | 0.194 | 0.208 | 0.217 | 0.302 | 0.302 | 0.308 | 0.313 | 0.249 | 0.311 | 0.257 | 0.244 | 0.281 | 0.241 | 0.271 | 0.293 | 0.088 | 0.007 | --    |       |     |
| P35         | 0.151 | 0.182 | 0.161 | 0.171 | 0.181 | 0.218 | 0.149 | 0.140 | 0.178 | 0.166 | 0.154 | 0.151 | 0.157 | 0.154 | 0.175 | 0.164 | 0.129 | 0.142 | 0.153 | 0.236 | 0.236 | 0.242 | 0.248 | 0.193 | 0.245 | 0.197 | 0.187 | 0.223 | 0.185 | 0.214 | 0.235 | 0.053 | 0.015 | 0.024 | --    |     |
| P36         | 0.162 | 0.192 | 0.172 | 0.182 | 0.191 | 0.227 | 0.160 | 0.150 | 0.187 | 0.172 | 0.165 | 0.160 | 0.168 | 0.162 | 0.181 | 0.177 | 0.143 | 0.157 | 0.155 | 0.252 | 0.252 | 0.258 | 0.264 | 0.205 | 0.242 | 0.195 | 0.189 | 0.225 | 0.183 | 0.214 | 0.237 | 0.049 | 0.021 | 0.025 | 0.019 | --  |

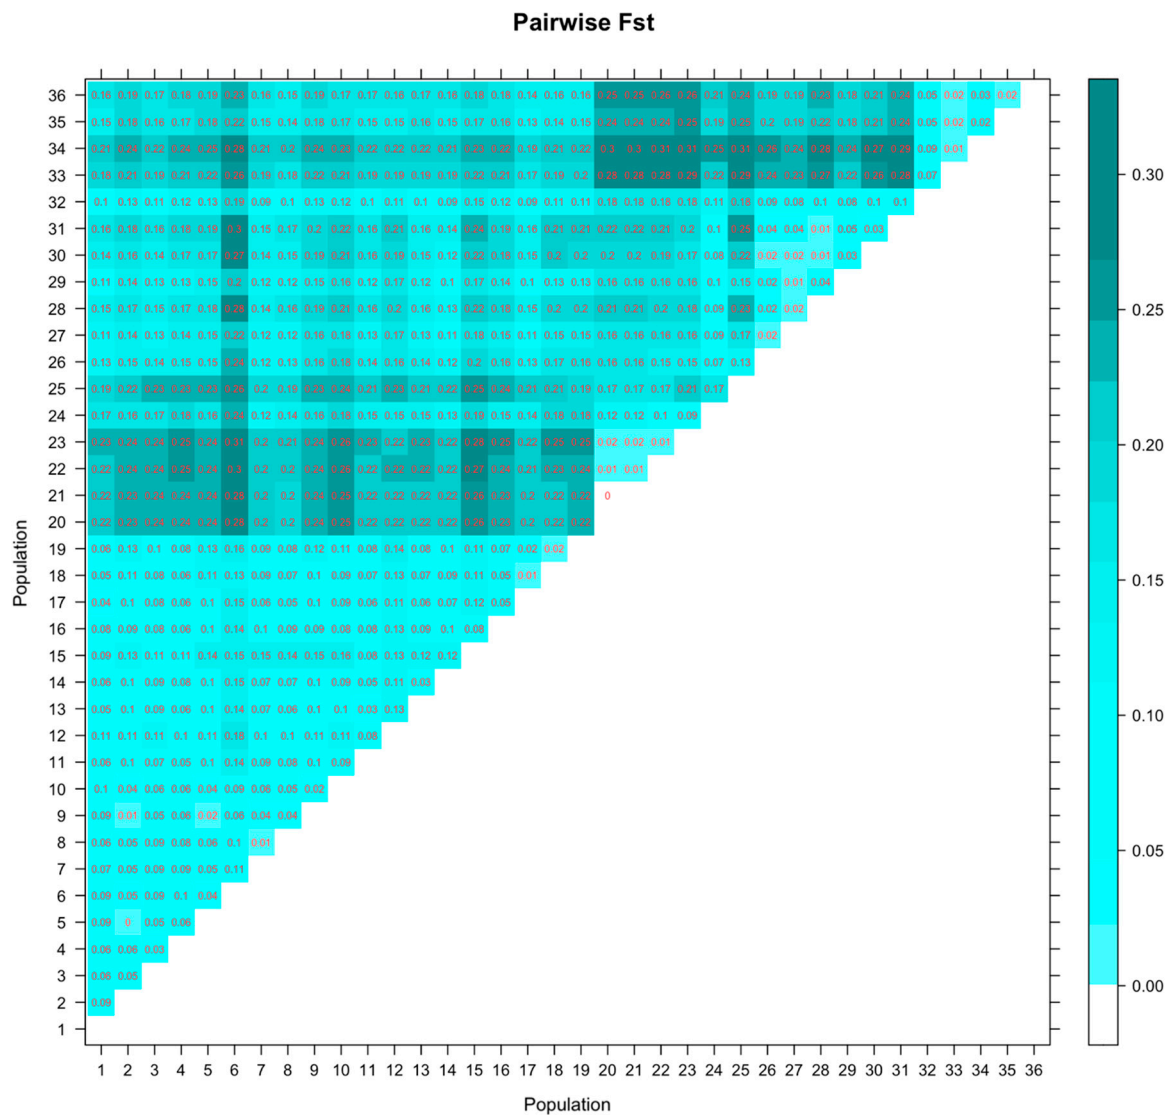

**Figure S1.** Levelplot of pairwise Fst values between populations.
